# Supplementary material for: Are children with disabilities more likely to be malnourished than children without disabilities? Evidence from the Multiple Indicator Cluster Surveys in 30 countries
Source: HighWire-hosted journal article supplement (doi:10.1136/bmjnph-2023-000779), 2024-01-10

Supplementary Figure 1: Meta-analysis comparing prevalence of underweight in children with and without disabilities

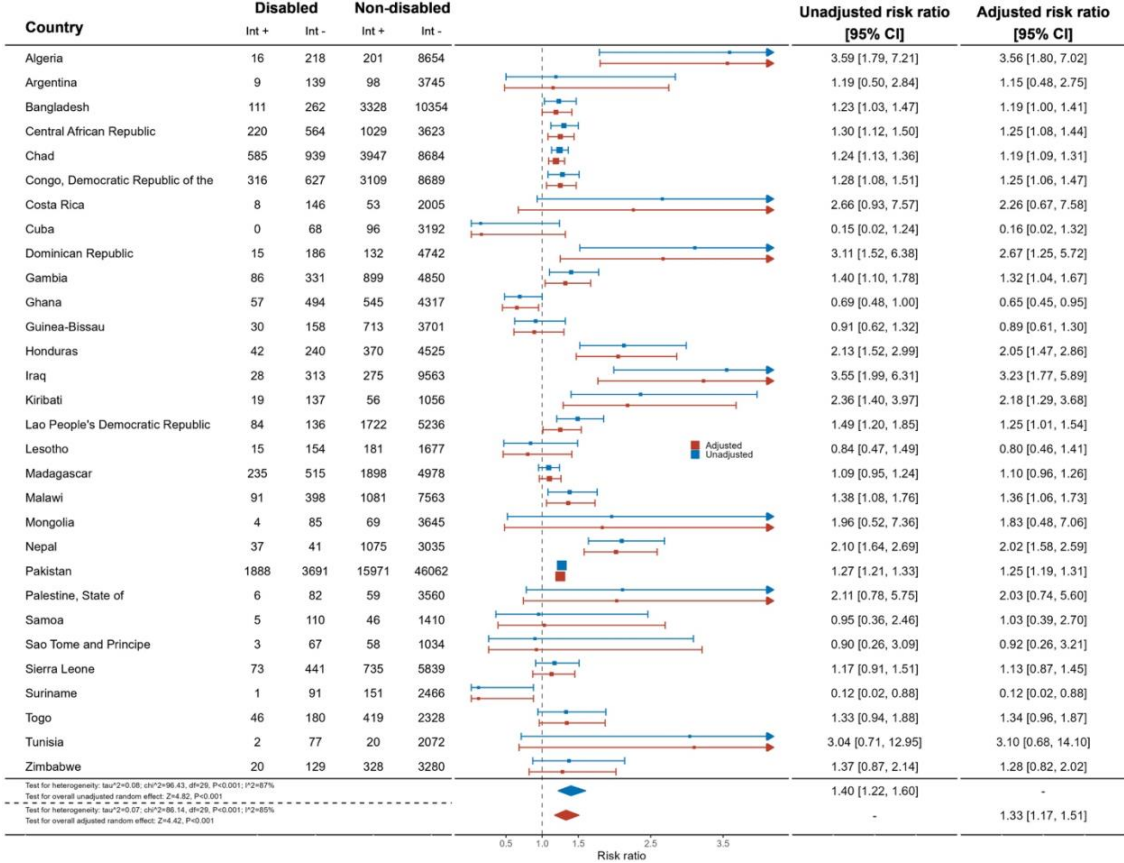

Supplementary Figure 2: Meta-analysis comparing prevalence of underweight in girls with and without disabilities

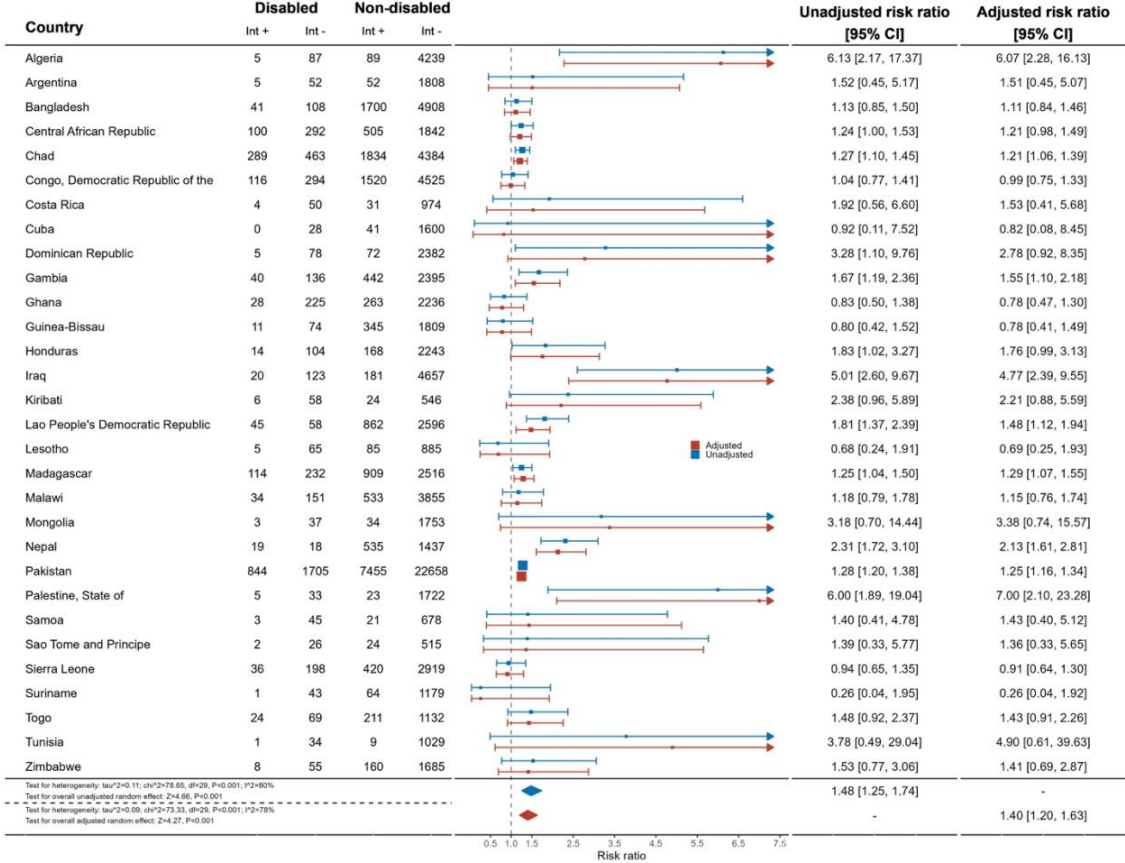

Supplementary Figure 3: Meta-analysis comparing prevalence of underweight in boys with and without disabilities

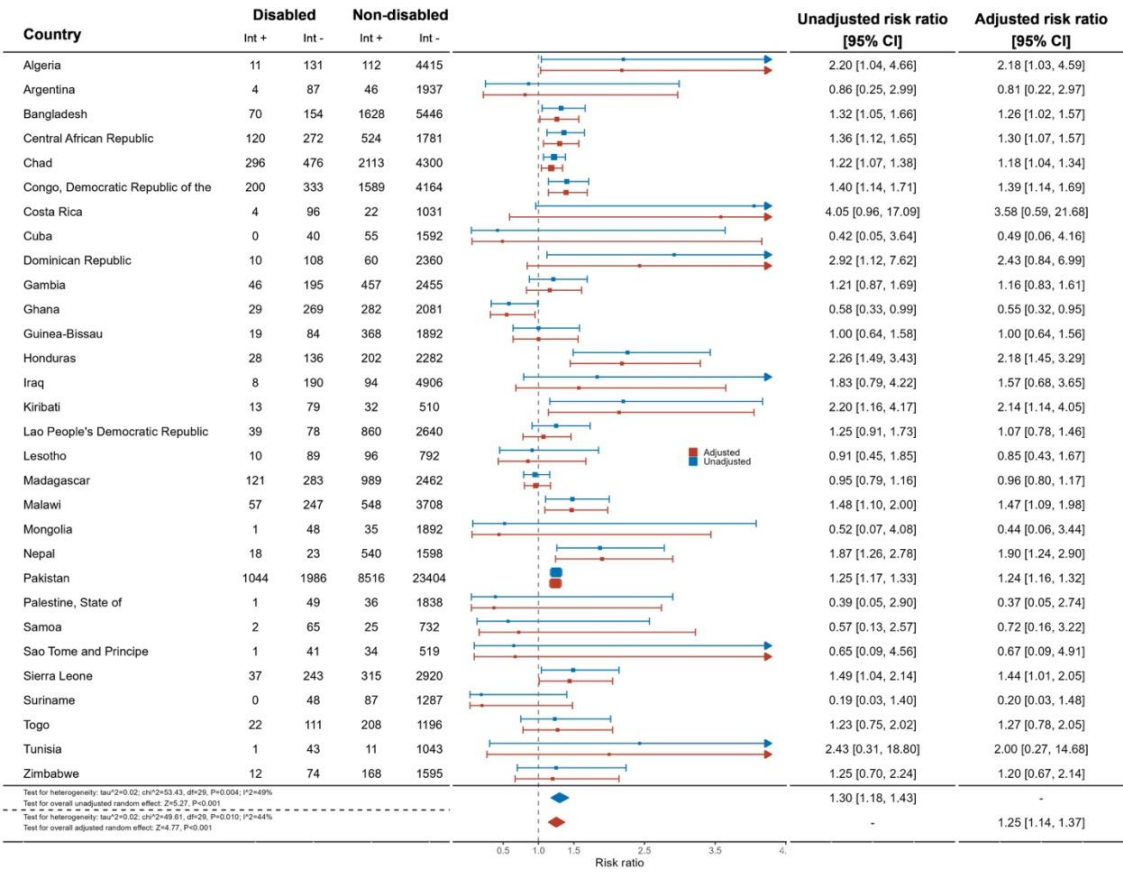

Supplementary Figure 4: Meta-analysis comparing prevalence of wasting in children with and without disabilities

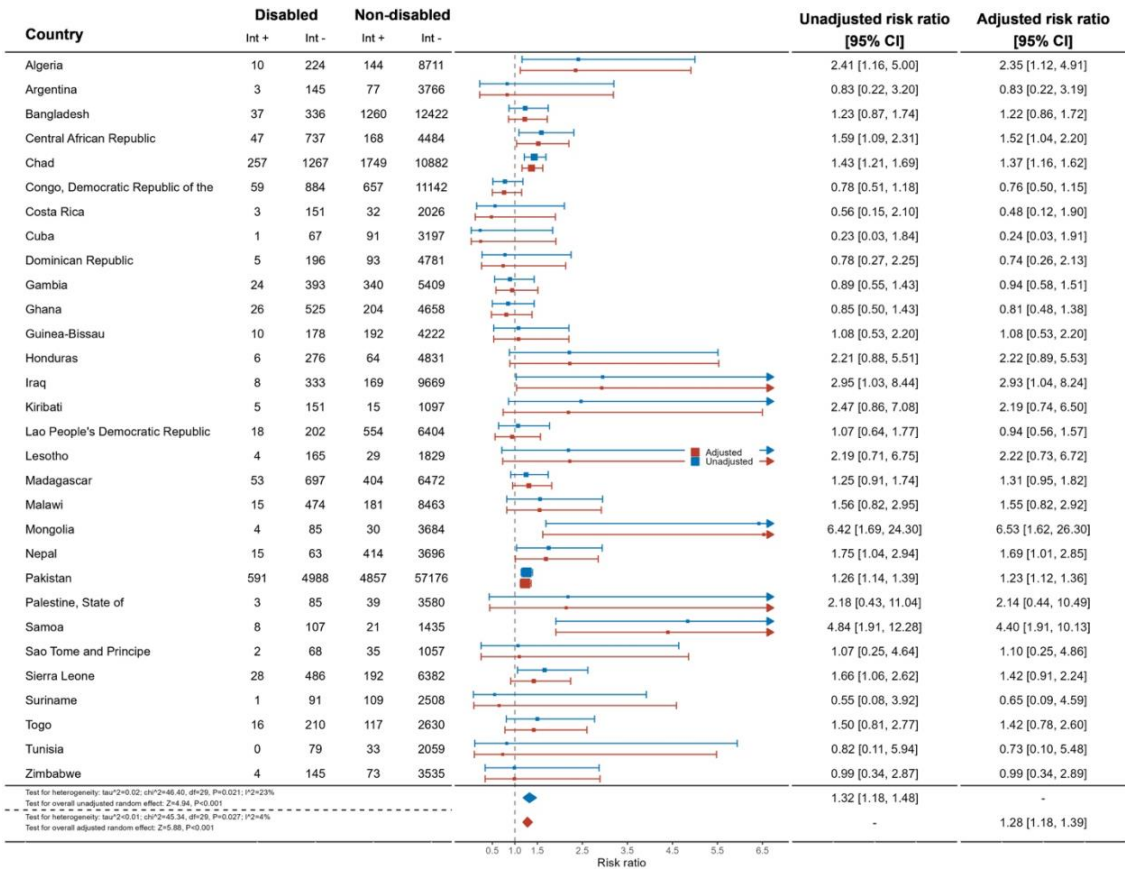

Supplementary Figure 5: Meta-analysis comparing prevalence of wasting in girls with and without disabilities

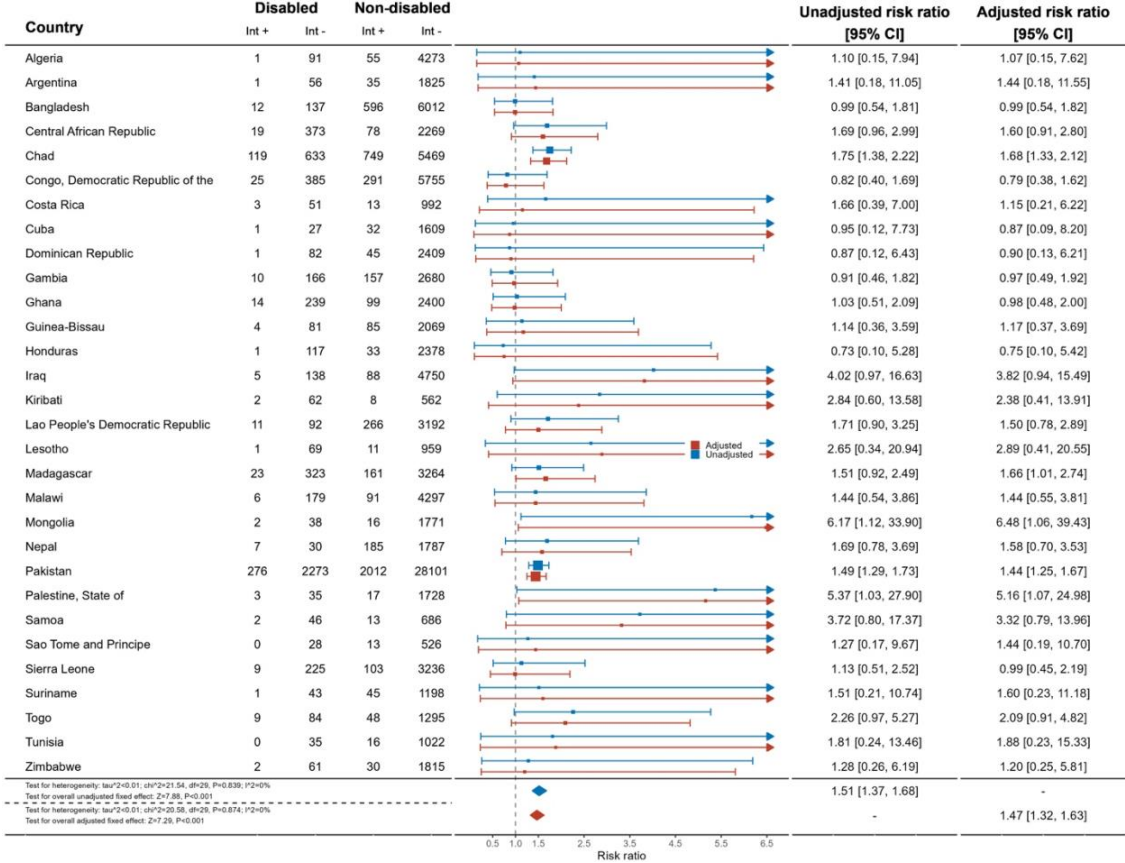

Supplementary Figure 6: Meta-analysis comparing prevalence of wasting in boys with and without disabilities

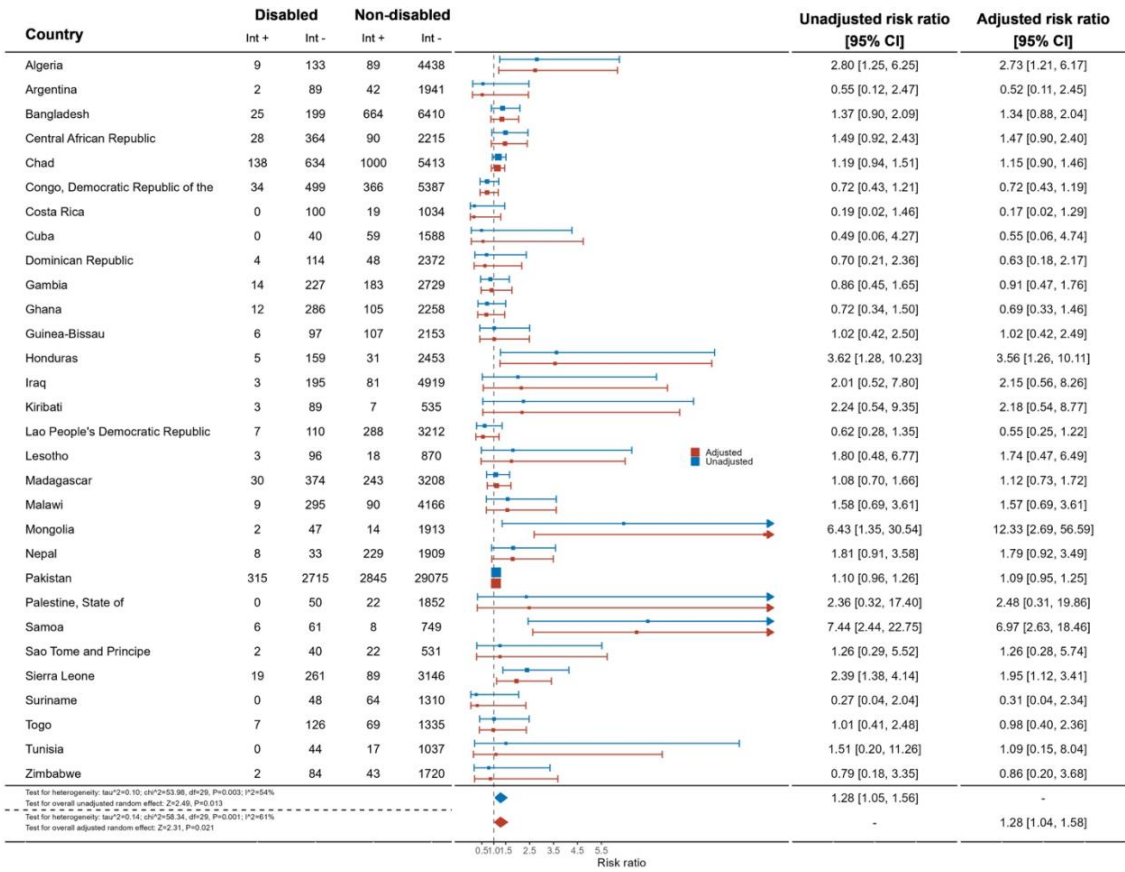

Supplementary Figure 7: Meta-analysis comparing prevalence of stunting in children with and without disabilities

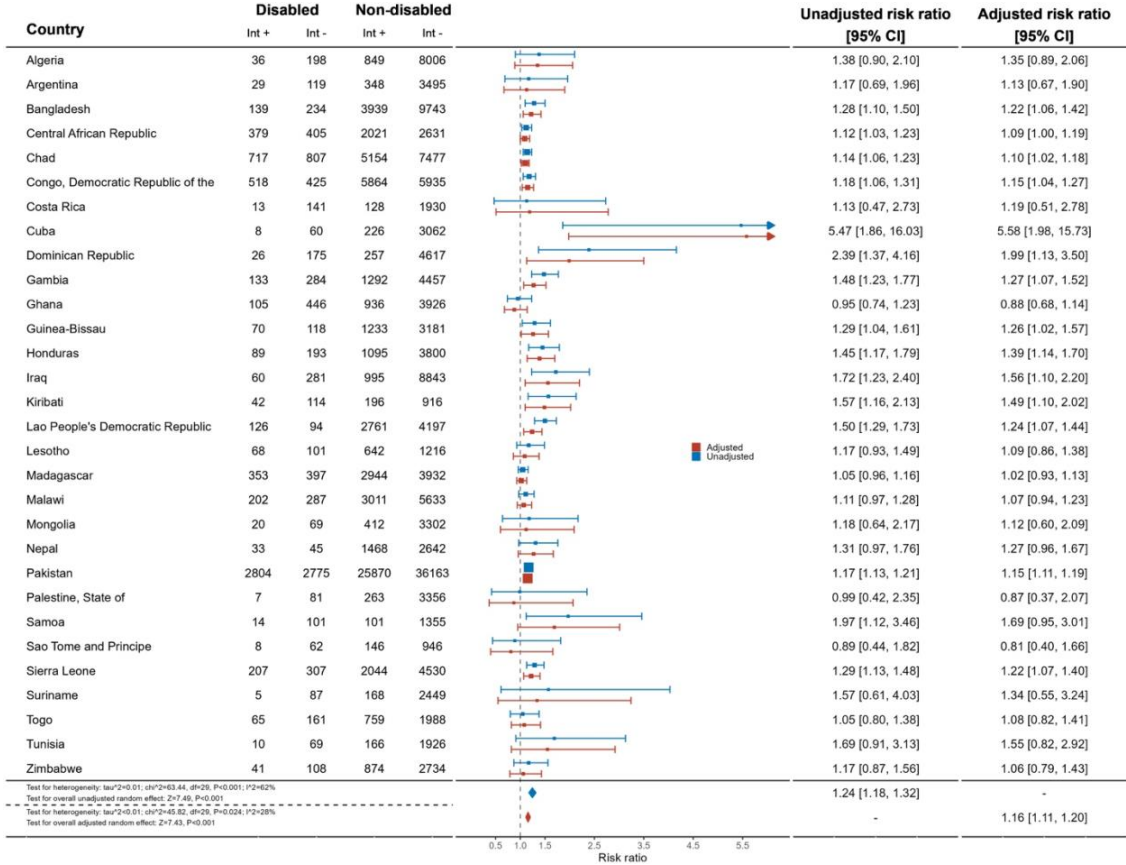

Supplementary Figure 8: Meta-analysis comparing prevalence of stunting in girls with and without disabilities

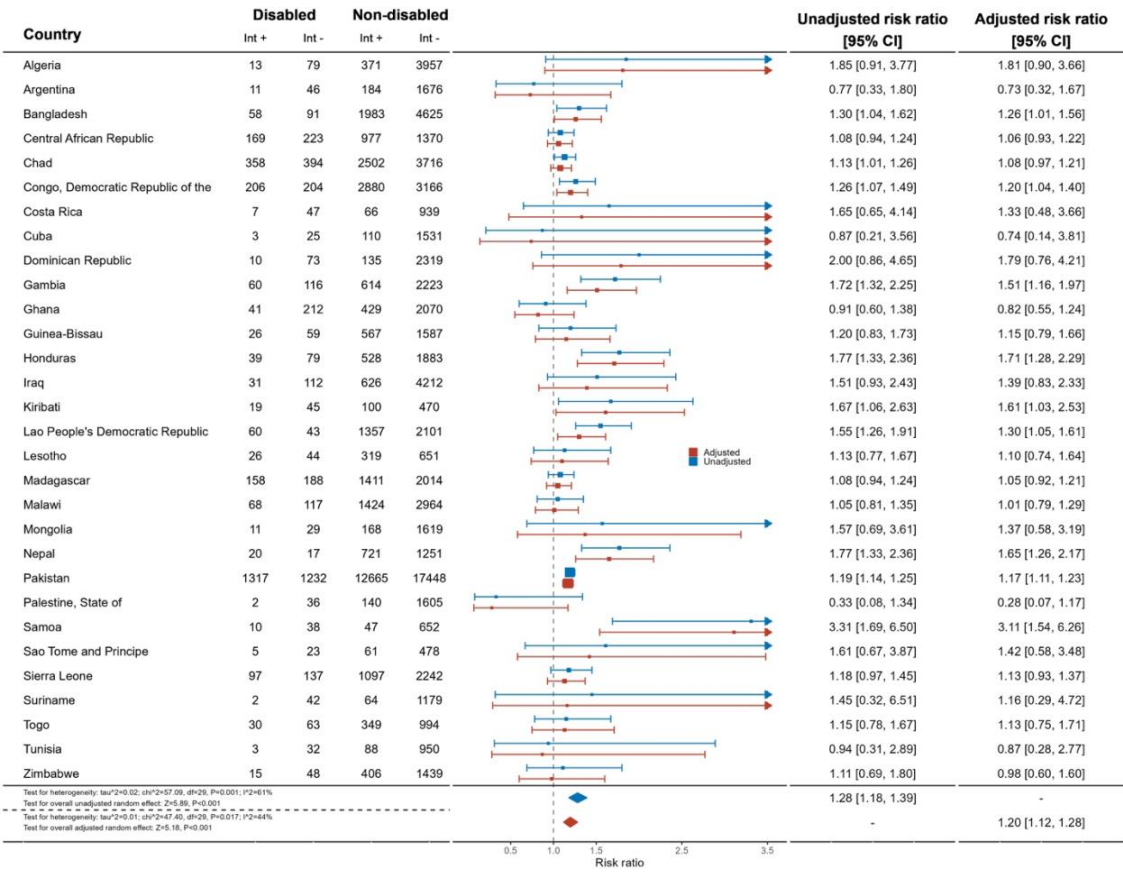

Supplementary Figure 9: Meta-analysis comparing prevalence of stunting in boys with and without disabilities

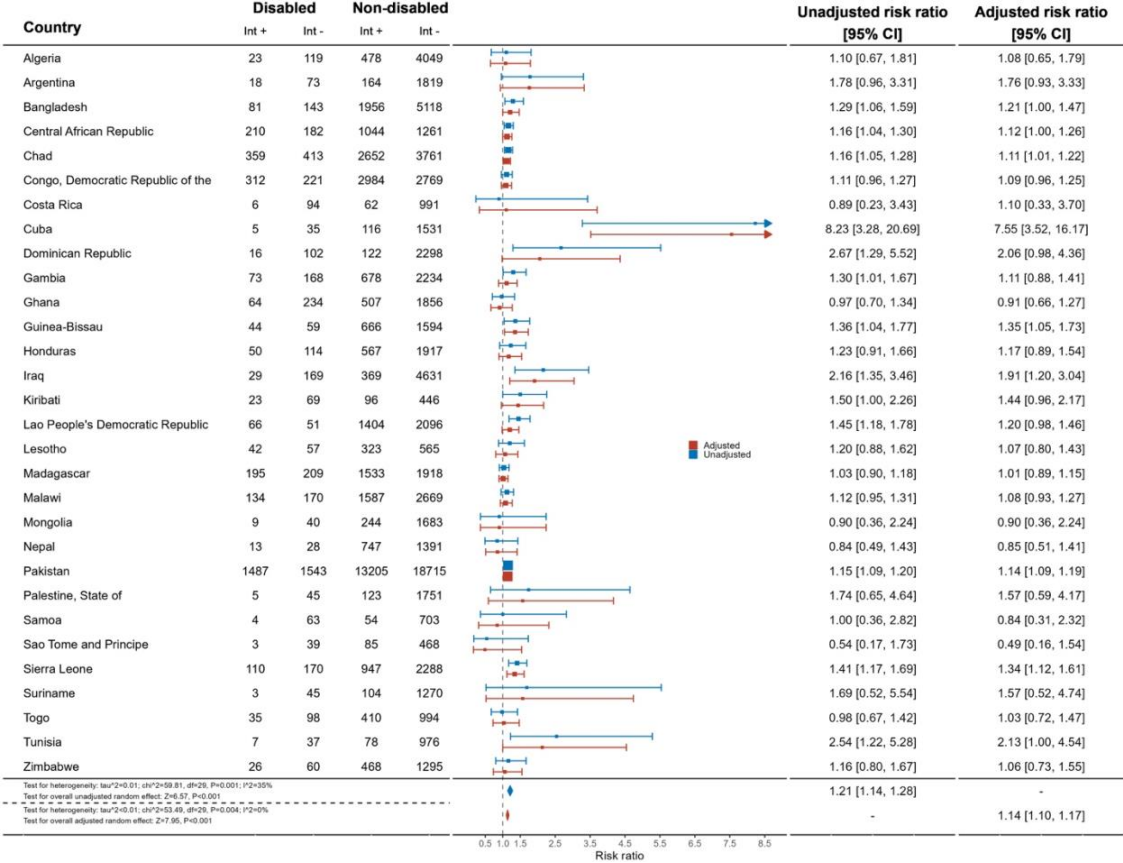

Supplement: bmjnph-2023-000779supp001_data_supplement.pdf [file bmjnph-2023-000779supp001_data_supplement.pdf]
